# Supplementary material
Source: publisher site journal article supplement (https://thieme-connect.com/media/10.1055-s-00035024/201103/supmat/10-1160-th11-02-0061-suppl.pdf)
Supplement: Supplementary file 1 [file 10-1160-th11-02-0061-suppl.pdf]

# Suppl. Figure to Keogh et al. “Validation of the CHADS<sub>2</sub> clinical prediction rule to predict ischaemic stroke. A systematic review and meta-analysis” (Thromb Haemost 2011; 106.3)

Suppl. Figure 1: Summary receiver operating characteristics (sROC) plots for each cut-off point of the CHADS<sub>2</sub> score\*

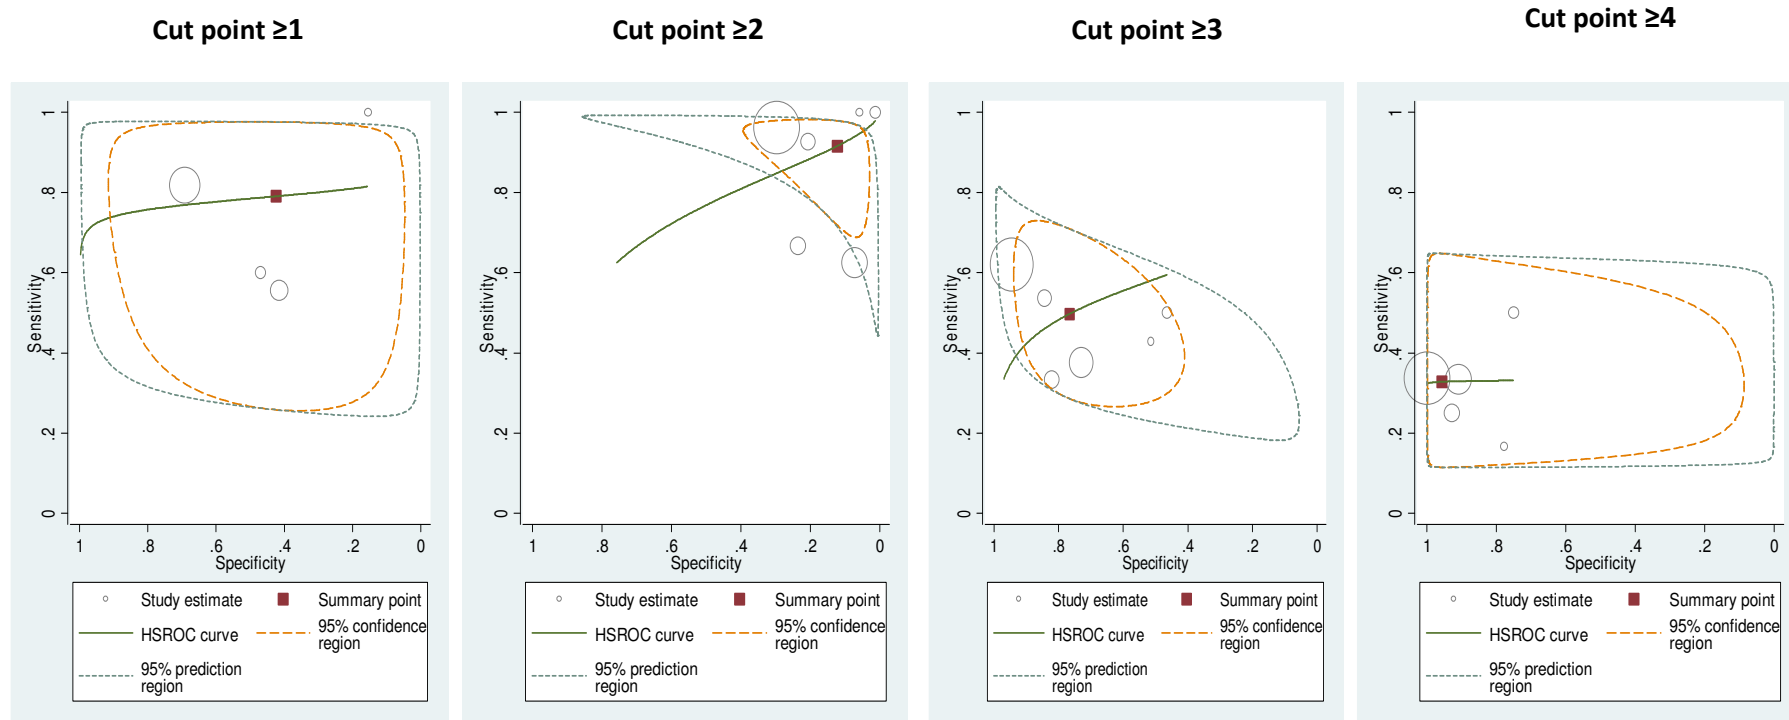

**Summary receiver operating characteristics (sROC) plots for each cut-off point of the CHADS<sub>2</sub> CPR\*** This provides a graphical view of pooled estimates for each of the cut-points of the CHADS<sub>2</sub> score. The 95% confidence region and 95% prediction region illustrate the precision with which pooled values are estimated and to illustrate the amount of between study variation, respectively. \*There was insufficient data to complete this analysis for  $\geq 5$  or  $\geq 6$
